# Supplementary material for: The Association of Parental Interest in Entrepreneurship with the Entrepreneurial Interest of Spanish Youth
Source: MDPI journal article supplement (doi:10.3390/ijerph17134744), 2020-07-01
Supplement: s1 [file s1]

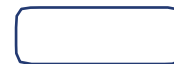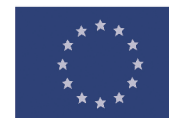

Fondo Europeo  
de Desarrollo Regional

**Codes:**

FDU2012-39080-C07-00

FDU2012-39080-C07-01

EDU2012-39080-C07-05

EDU2012-39080-C07-03

EDU2012-39080-C07-06

EDU2012-39080-C07-04

EDU2012-39080-C07-07

From educational times to social times: the daily construction of the situation of young people in a networked society. Social and teaching-related problems and alternatives.

This anonymous and confidential questionnaire is designed to find out how you organize and share academic and leisure time in your daily life. Your collaboration is essential for the development of this project, for which reason we are asking you to give us a few minutes of your time and respond sincerely to all the questions.

Many Thanks.

[illegible]

## LIFE AT THE EDUCATIONAL CENTER

**11. You normally travel to your educational center:** *Mark only one option*

☐Walking – ☐By bicycle – ☐By motorbike – ☐By school bus – ☐On public transport – ☐By car (I'm driven) – ☐By car (I drive)

☐Other, which? .....

**12. How long does it usually take you to travel from your home to your educational center?** ..... minutes

**13. Indicate your agreement with the following expressions** (1= not at all, 2=a little, 3=somewhat, 4=quite a lot and 5=very much so)

| CLASS DAYS ...                                            |                                      | 1-5 |
|-----------------------------------------------------------|--------------------------------------|-----|
| It is difficult for me to maintain my attention in class. |                                      |     |
| I feel weighed down everything that I have to do.         |                                      |     |
| I feel tired when the classes are over.                   |                                      |     |
| I have enough time                                        | to be with my friends                |     |
|                                                           | to be with my family                 |     |
|                                                           | to do sports                         |     |
|                                                           | to go to extra-curricular activities |     |
|                                                           | to do the things I like              |     |
| Time passes very quickly at the educational center        |                                      |     |
| Time passes very quickly outside the educational center   |                                      |     |

**14. How often can you do the following in your classes?** (1= not at all, 2=a little, 3=somewhat, 4=quite often and 5=very often)

|                                                                                     | 1-5 |
|-------------------------------------------------------------------------------------|-----|
| Work in groups and work collaboratively                                             |     |
| Use other spaces and resources of the center (library, computer and ICT room, etc.) |     |
| Work at my own pace                                                                 |     |
| Alternate between activities of different intensity (activity/rest)                 |     |
| Listen to the explanations of the teacher                                           |     |
| Reflect upon and discuss the subject matter                                         |     |
| Reflect upon and discuss topics in the news                                         |     |
| Organize things myself                                                              |     |
| Speak about the problems that affect us                                             |     |
| Strengthen creativity                                                               |     |
| Strengthen self-knowledge: preferences, likes, limits, etc.                         |     |
| Comment on future training and/or professional careers                              |     |

**15. since you have been in Non-obligatory Secondary Education** (since you left ESO Escuela Secundaria Obligatoria), **what mark has been the most frequent one in your exams?** (a figure between 0 and 10) .....

**16. What timetable do you prefer?** *Mark only one option*

☐Morning classes only

☐Afternoon classes only

☐Space classes between mornings and one afternoon

☐Space classes between mornings and some afternoons

☐Space classes between all the mornings and all the afternoons

☐Other. Which? .....

☐Makes no difference to you

**17. How many minutes do you spend studying and doing homework every day?** ..... minutes

**This time...** ☐too little ☐enough ☐excessive

**18. Indicate your degree of satisfaction with the duration and the distribution of the classroom hours, breaks between classes, and holidays**

(1= not at all, 2=a little, 3=somewhat, 4=quite a lot, and 5=very satisfied). *Point out also which aspects, if you could decide, you would modify*

|              |                | Satisfaction (1-5)    | REDUCE                | MAINTAIN              | INCREASE              |
|--------------|----------------|-----------------------|-----------------------|-----------------------|-----------------------|
| Duration     | Class sessions |                       | <input type="radio"/> | <input type="radio"/> | <input type="radio"/> |
|              | Break times    |                       | <input type="radio"/> | <input type="radio"/> | <input type="radio"/> |
|              | Vacations      |                       | <input type="radio"/> | <input type="radio"/> | <input type="radio"/> |
|              |                | CONCENTRATE MORE      | MAINTAIN              | DISTRIBUTE            |                       |
| Distribution | Class sessions | <input type="radio"/> | <input type="radio"/> | <input type="radio"/> |                       |
|              | Break times    | <input type="radio"/> | <input type="radio"/> | <input type="radio"/> |                       |
|              | Vacations      | <input type="radio"/> | <input type="radio"/> | <input type="radio"/> |                       |

**19. During the breaks...** *Choose only one option (the most frequent) in each case*

- WHERE ARE YOU?

☐Playground

☐Library

☐Canteen at center

☐Street

☐Other, Which? .....

- WHAT ARE YOU DOING? ☐Going around with friends

☐Doing sport

☐Walking around

☐Smoking

☐Other, Which? .....

## FAMILY LIFE

**20. Indicate your degree of agreement with the following expressions** (1= not at all, 2=a little, 3=somewhat, 4=quite a lot and 5=very much so)

|                                                                                            | 1-5 |
|--------------------------------------------------------------------------------------------|-----|
| My family life is ideal most of the time                                                   |     |
| The conditions of my family life are excellent                                             |     |
| I am satisfied with my family life                                                         |     |
| Up until now I have achieved the important things that I want to achieve in my family life |     |
| If I were to decide about my family life, I would not change a thing                       |     |
| One day I would like to have my own family life                                            |     |

## FREE TIME

21. Indicate the three most important leisure activities from among those you practice

a)

From among the following characteristics, mark with an "x" those that fit best with each of your preferred leisure activities

|  |  |  |  |  |
|--|--|--|--|--|
|  |  |  |  |  |
|  |  |  |  |  |
|  |  |  |  |  |

|  |  | Leisure activity |   |   |   |   |
|--|--|------------------|---|---|---|---|
|  |  | a                | b | c | d | e |

|                  |  |                                                    |  |  |  |  |
|------------------|--|----------------------------------------------------|--|--|--|--|
| 23. Organization |  | Independently, by myself                           |  |  |  |  |
|                  |  | In an organized way, in an association, club, etc. |  |  |  |  |

|  |  |                          |  |  |  |  |
|--|--|--------------------------|--|--|--|--|
|  |  | Both                     |  |  |  |  |
|  |  | Only in holiday periods. |  |  |  |  |

|  |  |                        |  |  |  |  |
|--|--|------------------------|--|--|--|--|
|  |  | Only 1-2 days a month. |  |  |  |  |
|  |  | 1-2 days               |  |  |  |  |

|               |  |                  |          |  |  |  |
|---------------|--|------------------|----------|--|--|--|
| 24. Frequency |  | Monday to Friday | 3-4 days |  |  |  |
|               |  | Every week       | 5 days   |  |  |  |

|  |  |        |  |  |  |  |
|--|--|--------|--|--|--|--|
|  |  | 1 day  |  |  |  |  |
|  |  | 2 days |  |  |  |  |

|                                                                                          |                    |  |  |  |  |  |
|------------------------------------------------------------------------------------------|--------------------|--|--|--|--|--|
| 25. Company<br>With whom do you do this activity?<br>(mark as many options as necessary) | Alone              |  |  |  |  |  |
|                                                                                          | With family        |  |  |  |  |  |
|                                                                                          | With people my age |  |  |  |  |  |
|                                                                                          | With other people  |  |  |  |  |  |
|                                                                                          |                    |  |  |  |  |  |

|  |  |                                                                                 |  |  |  |  |
|--|--|---------------------------------------------------------------------------------|--|--|--|--|
|  |  | In private premises, lent or rented, that I share with people of my age         |  |  |  |  |
|  |  | In associations, clubs, cultural groups (peñas), with people of different ages. |  |  |  |  |
|  |  | In municipal premises, such as sports halls, cultural centers play areas, etc.  |  |  |  |  |

|                                                                                            |                                                                                 |  |  |  |  |  |
|--------------------------------------------------------------------------------------------|---------------------------------------------------------------------------------|--|--|--|--|--|
| 26. Place<br>Where you usually practice this activity?<br>(point out as many as necessary) | In open public spaces such as the street, a park, a square, etc.                |  |  |  |  |  |
|                                                                                            | In leisure areas such as shopping malls, areas with bars, cinemas, discos, etc. |  |  |  |  |  |
|                                                                                            | In the country (mountains, countryside, beach, sea, etc.)                       |  |  |  |  |  |
|                                                                                            | In the installations of my own educational center                               |  |  |  |  |  |
|                                                                                            | In houses, urbanizations and other private residences                           |  |  |  |  |  |
|                                                                                            |                                                                                 |  |  |  |  |  |

|                                                                                                                                    |  |  |  |  |  |  |
|------------------------------------------------------------------------------------------------------------------------------------|--|--|--|--|--|--|
| 27. If you have a digital device (smartphone, iPod, tablet, GPS, etc.) when on one of these activities, mark the corresponding box |  |  |  |  |  |  |
|------------------------------------------------------------------------------------------------------------------------------------|--|--|--|--|--|--|

|                                                                                                                                                                                |  |  |  |  |  |  |
|--------------------------------------------------------------------------------------------------------------------------------------------------------------------------------|--|--|--|--|--|--|
| 28. If you share and/or disseminate each one of these activities through the social media and/or virtual forums (wikis, blogs, Facebook, Twitter, etc.), tick the relevant box |  |  |  |  |  |  |
|--------------------------------------------------------------------------------------------------------------------------------------------------------------------------------|--|--|--|--|--|--|

|                                                                                                                                                           |  |  |  |  |  |  |
|-----------------------------------------------------------------------------------------------------------------------------------------------------------|--|--|--|--|--|--|
| 29. If you participate in any type of competition related with one of these activities (tournaments, competitions, contests, etc.), tick the relevant box |  |  |  |  |  |  |
|-----------------------------------------------------------------------------------------------------------------------------------------------------------|--|--|--|--|--|--|

|                                                                                                                                                |  |                  |   |   |   |   |
|------------------------------------------------------------------------------------------------------------------------------------------------|--|------------------|---|---|---|---|
| 30. FROM THIS POINT, answer each question with a number from 1 to 5 (1= not at all, 2=a little, 3=somewhat, 4=quite a lot, and 5=very much so) |  | Leisure activity |   |   |   |   |
| 31. Indicate the extent of your agreement with the following statements. When I am doing this activity....                                     |  | a                | b | c | d | e |

|                                                                                                                 |  |  |  |  |  |  |
|-----------------------------------------------------------------------------------------------------------------|--|--|--|--|--|--|
| I am more in form, I control my movements better, I maintain and improve my physical condition, etc.            |  |  |  |  |  |  |
| I feel more satisfied, I enjoy doing it, I have fun, etc.                                                       |  |  |  |  |  |  |
| I am more creative, I acquire knowledge, learn things, broaden my world, etc.                                   |  |  |  |  |  |  |
| I develop new manual skills and learn or get better at technical skills                                         |  |  |  |  |  |  |
| I do different things with more people, I feel part of a group, it helps me relate better to other people, etc. |  |  |  |  |  |  |

|                                                                           |  |                  |   |   |   |   |
|---------------------------------------------------------------------------|--|------------------|---|---|---|---|
| 32. Indicate the extent of your agreement with the following affirmations |  | Leisure activity |   |   |   |   |
|                                                                           |  | a                | b | c | d | e |

|                                                                                                                     |  |  |  |  |  |  |
|---------------------------------------------------------------------------------------------------------------------|--|--|--|--|--|--|
| I hold responsibility in the organization for the activity                                                          |  |  |  |  |  |  |
| I would enjoy the activity more if I took a leading role in its organization                                        |  |  |  |  |  |  |
| Participation in the organization of the space in which I practice the activity is related to what I get out of it. |  |  |  |  |  |  |
| I practice this activity in spaces that I organize myself                                                           |  |  |  |  |  |  |
| I am satisfied with this activity                                                                                   |  |  |  |  |  |  |
| This activity is very important in my life                                                                          |  |  |  |  |  |  |

|                                                            |  |      |     |  |  |  |
|------------------------------------------------------------|--|------|-----|--|--|--|
| 33. Would you give up some leisure activity that you like? |  | OYes | ONo |  |  |  |
| If affirmative indicate which one: .....                   |  |      |     |  |  |  |

|                                                                            |  |                                   |                           |  |  |  |
|----------------------------------------------------------------------------|--|-----------------------------------|---------------------------|--|--|--|
| 34. If affirmative, what is your reason for doing it? Mark only one option |  |                                   |                           |  |  |  |
| OLack of time                                                              |  | ONo where to do it in my area     | OMy family doesn't let me |  |  |  |
| OLack of money                                                             |  | OUndecidedness, laziness          | OIncompatible hours       |  |  |  |
| ONo partner                                                                |  | OBecause I have a lot of homework | OTransport difficulties   |  |  |  |
| OOther causes. Which? .....                                                |  |                                   |                           |  |  |  |

## HEALTH AND QUALITY OF LIFE

|                                                                                                                                                       |                |
|-------------------------------------------------------------------------------------------------------------------------------------------------------|----------------|
| <b>34. Indicate how many days a week (Monday to Sunday) you go for a walk and for how long.</b>                                                       |                |
| Stroll or walk..... days a week and I usually spend..... minutes each time.                                                                           |                |
| <b>35. How many hours do you usually sleep?</b>                                                                                                       |                |
| Days with class.....                                                                                                                                  | Weekends ..... |
| <b>36. Indicate your degree of agreement with the following expressions (1=not at all, 2=a little, 3=somewhat, 4=quite a lot, and 5=very much so)</b> |                |
| At present, my state of health is good                                                                                                                | <b>1-5</b>     |
| I am satisfied with my corporal image                                                                                                                 |                |
| I am in good physical shape                                                                                                                           |                |
| I am a physically active person                                                                                                                       |                |
| In general, I am enjoying my life                                                                                                                     |                |

## STUDIES AND THE JOB MARKET IN THE FUTURE

|                                                                                                                                     |            |                               |            |
|-------------------------------------------------------------------------------------------------------------------------------------|------------|-------------------------------|------------|
| <b>37. Indicate how much you agree with the following</b> (1=not at all, 2=a little, 3=somewhat, 4=quite a lot, and 5=a great deal) |            |                               |            |
| <b>Studying helps me to ...</b>                                                                                                     | <b>1-5</b> | <b>Working helps me to...</b> | <b>1-5</b> |
| Be successful in life                                                                                                               |            | Become independent            |            |
| Find work                                                                                                                           |            | Collaborate with my family    |            |
| Relate to colleagues at work                                                                                                        |            | Feel useful                   |            |
| Earn money                                                                                                                          |            | Have money                    |            |
|                                                                                                                                     |            |                               |            |
| I prefer to look for work than to continue studying                                                                                 |            | It is worth looking for work  |            |

## ENTREPRENEURSHIP

Entrepreneurship is defined as “creating your own firm or self-employment, in other words, detecting a business opportunity, organizing the necessary resources and assuming risks to contribute to your own professional and socio-economic development”

|                                                                                                                                                              |                                  |                                                     |            |                                 |            |
|--------------------------------------------------------------------------------------------------------------------------------------------------------------|----------------------------------|-----------------------------------------------------|------------|---------------------------------|------------|
| <b>38. Bearing in mind the above definition, mark with an “x” the three aspects that you consider most important for entrepreneurship</b>                    |                                  |                                                     |            |                                 |            |
| Detect a business opportunity                                                                                                                                | Self-employment                  | Manage resources (human, economic...)               |            |                                 |            |
| Improve your professional development                                                                                                                        | Assume risk                      | Create new jobs                                     |            |                                 |            |
| Other relevant aspects. Indicate which: .....                                                                                                                |                                  |                                                     |            |                                 |            |
| <b>39. Of the subjects that you have studied or are studying, which do you think favor entrepreneurship most of all? Indicate 3</b>                          |                                  |                                                     |            |                                 |            |
|                                                                                                                                                              |                                  |                                                     |            |                                 |            |
| <b>40. Mark from 1 to 5 your degree of personal interest in entrepreneurship (1= not at all, 2=a little, 3=somewhat, 4=quite a lot and 5=very much)</b>      |                                  |                                                     |            |                                 |            |
| <b>41. Do you know of some entrepreneurial network?</b> ONo OYes, Which? .....                                                                               |                                  |                                                     |            |                                 |            |
| <b>42. Mark with an “x” the three reasons that you consider most important to create your firm</b>                                                           |                                  |                                                     |            |                                 |            |
| Family tradition                                                                                                                                             | Create work for others           | Earn money                                          |            |                                 |            |
| Economic independence                                                                                                                                        | Get a job                        | Put my ideas into practice                          |            |                                 |            |
| Social acknowledgement                                                                                                                                       | Group management                 | Contribute to economic and social growth            |            |                                 |            |
| Others. Indicate which: .....                                                                                                                                |                                  |                                                     |            |                                 |            |
| <b>43. Mark with an “x” the three most important difficulties that you perceive in society to create your own firm</b>                                       |                                  |                                                     |            |                                 |            |
| Assume risks                                                                                                                                                 | Work too many hours              | Lack of money to start up the activity              |            |                                 |            |
| Weak institutional support                                                                                                                                   | Fear of failure                  | Little or no training in entrepreneurship           |            |                                 |            |
| Assume risks                                                                                                                                                 | Bureaucracy ( <i>paperwork</i> ) | Lack of ideas to start up the firm                  |            |                                 |            |
| Weak institutional support                                                                                                                                   | Others. Indicate which: .....    |                                                     |            |                                 |            |
| <b>44. Grade the presence that the following aspects have had in your training (1=not at all, 2=a little, 3=somewhat, 4=quite a lot, and 5=very much so)</b> |                                  |                                                     |            |                                 |            |
| <b>METHODOLOGIES</b>                                                                                                                                         | <b>1-5</b>                       | <b>CAPABILITIES</b>                                 | <b>1-5</b> | <b>KNOWLEDGE</b>                | <b>1-5</b> |
| Theoretical classes                                                                                                                                          |                                  | Leadership                                          |            | Firm plan                       |            |
| Practical exercises                                                                                                                                          |                                  | Commitment and motivation                           |            | Marketing                       |            |
| Case studies                                                                                                                                                 |                                  | Creativity/Innovation                               |            | Languages                       |            |
| Project design                                                                                                                                               |                                  | Conflict/crisis management (working under pressure) |            | Computing                       |            |
| Working in a team                                                                                                                                            |                                  | Communicative capability                            |            | Organizational planning         |            |
| Problem solving                                                                                                                                              |                                  | Capability to negotiate and to take decisions       |            | Obtaining resources             |            |
| Presentation and defense of works                                                                                                                            |                                  | Time management for personal and team work          |            | Legal aspects of creating firms |            |
|                                                                                                                                                              |                                  | Capacity to search for resources                    |            | Administrative management       |            |

**Observations.** If you wish to take any notes, please use this space:

**THANK YOU VERY MUCH FOR YOUR HELP**

**Red de Grupos de Investigación OcioGune**

**Universidades**

Santiago de Compostela, Barcelona, Burgos, Deusto, La Rioja, Nacional de Educación a Distancia, València.

**Contact:** angela.devalenzuela@usc.es
