# Supplementary material for: The Association of Parental Interest in Entrepreneurship with the Entrepreneurial Interest of Spanish Youth
Source: MDPI journal article supplement (doi:10.3390/ijerph17134744), 2020-07-01
Supplement: s1 [file s1]

## VIDA EN EL CENTRO ESCOLAR

11. Normalmente te desplazas a tu centro educativo: *Marca una sola opción*

- ☐ Andando ☐ En bicicleta ☐ En moto ☐ En autobús escolar ☐ En transporte público ☐ En coche (me llevan) ☐ En coche (conduzco)  
☐ Otro, ¿cuál? .....

12. ¿Cuántos minutos tardas habitualmente en llegar desde casa a tu centro educativo? ..... minutos

13. Indica tu grado de acuerdo con las siguientes expresiones (1=nada, 2=poco, 3=algo, 4=bastante y 5=mucho)

|                      |     |
|----------------------|-----|
| LOS DÍAS DE CLASE... | 1-5 |
|----------------------|-----|

|                      |     |
|----------------------|-----|
| LOS DÍAS DE CLASE... | 1-5 |
|----------------------|-----|

|                                                              |                                 |  |
|--------------------------------------------------------------|---------------------------------|--|
| Me cuesta mantener la atención en las clases                 |                                 |  |
| Me siento agobiada/o por todas las cosas que tengo que hacer |                                 |  |
| Me siento fatigada/o al acabar las clases                    |                                 |  |
| Tengo tiempo suficiente para                                 | estar con mis amigas o amigos   |  |
|                                                              | estar con mi familia            |  |
|                                                              | practicar deporte               |  |
|                                                              | ir a actividades extraescolares |  |
|                                                              | hacer las cosas que me gustan   |  |
| El tiempo que paso en el centro se me hace corto             |                                 |  |
| El tiempo que paso fuera del centro se me hace corto         |                                 |  |

14. ¿Con qué frecuencia puedes realizar lo siguiente en tus clases? (1= *nada*, 2=*poco*, 3=*algo*, 4=*bastante* y 5=*mucho*)

|                                                                                                                    |     |
|--------------------------------------------------------------------------------------------------------------------|-----|
| 14. ¿Con qué frecuencia puedes realizar lo siguiente en tus clases? (1=nada, 2=poco, 3=algo, 4=bastante y 5=mucho) | 1-5 |
|--------------------------------------------------------------------------------------------------------------------|-----|

|                                                                            |  |
|----------------------------------------------------------------------------|--|
| Trabajar en grupos y colaborativamente                                     |  |
| Utilizar otros espacios y recursos del centro (biblioteca, aula TIC, etc.) |  |
| Trabajar a mi ritmo                                                        |  |
| Alternar actividades de diversa intensidad (actividad/descanso)            |  |
| Escuchar las explicaciones del profesor/a                                  |  |
| Reflexionar y debatir sobre el temario                                     |  |
| Reflexionar y debatir sobre temas de actualidad                            |  |
| Organizarme por mi cuenta                                                  |  |
| Hablar sobre los problemas que nos afectan                                 |  |
| Potenciar la creatividad                                                   |  |
| Potenciar el autoconocimiento: preferencias, gustos, límites, etc.         |  |
| Comentar sobre futuras orientaciones formativas y/o profesionales          |  |

15. Desde que estás en Educación Secundaria Postobligatoria (desde que dejaste la ESO),

¿cuál es la nota que se repite más en tus evaluaciones? (pon una cifra entre 0 y 10) .....

16. ¿Qué modalidad de horario prefieres? *Marca una sola opción*

- ☐ Tener clase sólo por las mañanas  
☐ Tener clase sólo por las tardes  
☐ Repartir las clases entre todas las mañanas y una tarde  
☐ Repartir las clases entre todas las mañanas y varias tardes
- ☐ Repartir las clases entre todas las mañanas y todas las tardes  
☐ Otra. ¿Cuál? .....  
 .....  
☐ Te resulta indiferente

17. ¿Cuántos minutos dedicas diariamente a estudiar y realizar las tareas de clase? ..... minutos

Este tiempo... ☐ Es escaso ☐ Está bien ☐ Es excesivo

18. Indica tu grado de satisfacción con la duración y distribución de las sesiones de clase, los recreos y vacaciones

(1= nada, 2=poco, 3=algo, 4=bastante y 5=mucho). Señala también qué aspectos modificarías o mantendrías si pudieras decidir

|              |                |                    |                          |                          |                          |
|--------------|----------------|--------------------|--------------------------|--------------------------|--------------------------|
|              |                | Satisfacción (1-5) | REDUCIR                  | MANTENER                 | AUMENTAR                 |
| Duración     | Sesiones clase |                    | <input type="checkbox"/> | <input type="checkbox"/> | <input type="checkbox"/> |
|              | Recreos        |                    | <input type="checkbox"/> | <input type="checkbox"/> | <input type="checkbox"/> |
|              | Vacaciones     |                    | <input type="checkbox"/> | <input type="checkbox"/> | <input type="checkbox"/> |
|              |                |                    | CONCENTRAR MÁS           | MANTENER                 | DISTRIBUIR               |
| Distribución | Sesiones clase |                    | <input type="checkbox"/> | <input type="checkbox"/> | <input type="checkbox"/> |
|              | Recreos        |                    | <input type="checkbox"/> | <input type="checkbox"/> | <input type="checkbox"/> |
|              | Vacaciones     |                    | <input type="checkbox"/> | <input type="checkbox"/> | <input type="checkbox"/> |

19. Durante los recreos... *Escoje una única opción (la más frecuente) en cada caso*

- ¿DÓNDE ESTÁS? ☐ Patio ☐ Biblioteca ☐ Cafetería del centro ☐ Calle  
☐ Otro, ¿cuál? .....

- ¿QUÉ HACES? ☐ Estar con amigas o amigos ☐ Hacer deporte ☐ Pasear ☐ Fumar  
☐ Otra, ¿cuál? .....

## VIDA FAMILIAR

|                                                                                                              |     |
|--------------------------------------------------------------------------------------------------------------|-----|
| 20. Indica tu grado de acuerdo con las siguientes expresiones (1=nada, 2=poco, 3=algo, 4=bastante y 5=mucho) | 1-5 |
|--------------------------------------------------------------------------------------------------------------|-----|

|                                                                                                              |     |
|--------------------------------------------------------------------------------------------------------------|-----|
| 20. Indica tu grado de acuerdo con las siguientes expresiones (1=nada, 2=poco, 3=algo, 4=bastante y 5=mucho) | 1-5 |
|--------------------------------------------------------------------------------------------------------------|-----|

|                                                                                |  |
|--------------------------------------------------------------------------------|--|
| La mayoría de las veces mi vida familiar es ideal                              |  |
| Las condiciones de mi vida familiar son excelentes                             |  |
| Estoy satisfecho con mi vida familiar                                          |  |
| Hasta ahora he conseguido las cosas importantes que quiero en mi vida familiar |  |
| Si pudiera decidir sobre mi vida familiar, no cambiaría nada                   |  |
| Algún día me gustaría tener mi propia familia                                  |  |

## TIEMPO LIBRE

21. De todas las actividades de ocio que practicas, indica por orden las 3 más importantes

- a)  
b)  
c)

Si no has incluido ninguna actividad de ocio físico-deportivo, indica la que más practicas

d)

Si no has indicado ninguna actividad de ocio cultural, indica la que más realizas

e)

Actividad de ocio

a b c d e

22. Duración

Cada vez que realizas esta actividad, ¿cuántos minutos le dedicas?

De las características señaladas a continuación, marca con una "x" las que mejor se ajusten a cada una de tus actividades de ocio preferidas

23. Organización

De forma libre, por mi cuenta

De forma organizada, en una asociación, club, etc.

Ambas

24. Frecuencia

Sólo en períodos vacacionales

Sólo 1-2 días al mes

Todas las semanas

Lunes a viernes

1-2 días

3-4 días

5 días

Fines de semana

1 día

Los 2 días

25. Compañía

¿Con quién practicas esta actividad?  
(señala cuantas opciones necesites)

Solo

Con mi familia

Con gente de mi edad

Con otras personas

26. Lugar de realización

¿Dónde sueles practicar esta actividad?  
(señala cuantas opciones necesites)

En locales privados, cedidos o alquilados, que comparto con gente de mi edad

En asociaciones, clubes, sociedades o peñas, donde hay gente de distintas edades

En espacios municipales como polideportivos, centros culturales, ludotecas, etc.

En espacios públicos abiertos como la calle, un parque, una plaza, etc.

En espacios de ocio como centros comerciales, zonas de bares, cines, discotecas, etc.

En la naturaleza (montaña, campo, playa, mar, etc.)

En las instalaciones de mi propio centro escolar

En casas, urbanizaciones u otras residencias privadas

27. Si usas algún dispositivo digital (smartphone, iPod, tablet, receptor GPS, etc.) durante la realización de cada una de estas actividades, marca la casilla correspondiente

28. Si compartes y/o difundes cada una de estas actividades a través de redes sociales y/o foros virtuales (wikis, blogs, Facebook, Twitter, etc.), marca la casilla correspondiente

29. Si realizas algún tipo de competición relacionada con cada una de estas actividades (torneos, concursos, certámenes, etc.), marca la casilla correspondiente

A PARTIR DE AQUÍ responde a cada pregunta con un número del 1 al 5 (1= nada, 2=poco, 3=algo, 4=bastante y 5=mucho)

30. Indica tu grado de acuerdo con las siguientes afirmaciones. Cuando realizo esta actividad...

Actividad de ocio

a b c d e

Estoy más en forma, controlo mejor mis movimientos, mantengo o mejoro mi condición física, etc.

Me siento más satisfecho/a, disfruto haciéndolo, me divierte, etc.

Soy más creativo/a, adquiero conocimientos, aprendo cosas, amplío mi mundo, etc.

Desarrollo nuevas destrezas manuales y adquiero o perfecciono habilidades técnicas

Hago cosas diferentes con más gente, me siento parte de un grupo, me ayuda a relacionarme mejor con los demás, etc.

31. Indica tu grado de acuerdo con las siguientes afirmaciones

Actividad de ocio

a b c d e

Tengo responsabilidad en la organización de la actividad

Disfrutaría más de la actividad si asumiera más protagonismo en su organización

Participar en la organización del espacio en el que practico la actividad tiene relación con los beneficios que saco de ella

Practico esta actividad en espacios que yo mismo organizo

Estoy satisfecho con esta actividad

Esta actividad es muy importante en mi vida

32. ¿Renuncias a realizar alguna actividad de ocio que te gusta?

☐ Sí

☐ No

En caso afirmativo indica cual: .....

33. En caso afirmativo, ¿por qué motivo lo haces? Señala una sola opción de respuesta.

☐ Falta de tiempo

☐ Falta de dinero

☐ No tengo con quién

☐ Otras causas. ¿Cuáles? .....

☐ No hay donde hacerlo en mi localidad

☐ Falta de decisión, pereza

☐ Porque tengo muchas tareas escolares

☐ No me deja mi familia

☐ Horarios incompatibles

☐ Dificultades de transporte

## SALUD Y CALIDAD DE VIDA

**34. Indica cuántos días a la semana (de lunes a domingo) caminas o paseas y cuánto tiempo le dedicas**  
 Paseo o camino ..... días a la semana y suelo dedicarle ..... minutos cada vez

**35. ¿Cuántas horas duermes habitualmente?**  
 Los días de clase ..... Los fines de semana .....

**36. Indica tu grado de acuerdo con las siguientes expresiones (1= nada, 2=poco, 3=algo, 4=bastante y 5=mucho)**

|                                           | 1-5 |
|-------------------------------------------|-----|
| Actualmente, mi estado de salud es bueno  |     |
| Estoy satisfecho/a con mi imagen corporal |     |
| Estoy en buena forma física               |     |
| Soy una persona físicamente activa        |     |
| En general, estoy a gusto con mi vida     |     |

## ESTUDIOS Y MERCADO LABORAL EN EL FUTURO

**37. Indica tu grado de acuerdo con las siguientes expresiones (1= nada, 2=poco, 3=algo, 4=bastante y 5=mucho)**

| Estudiar me ayuda a...                      | 1-5 | Trabajar me ayuda a...        | 1-5 |
|---------------------------------------------|-----|-------------------------------|-----|
| Tener éxito en la vida                      |     | Independizarme                |     |
| Encontrar trabajo                           |     | Colaborar con la familia      |     |
| Relacionarme con los compañeros/as          |     | Sentirme útil                 |     |
| Ganar dinero                                |     | Disponer de dinero            |     |
| Prefiero buscar trabajo a seguir estudiando |     | Merece la pena buscar trabajo |     |

## EMPRENDIMIENTO

El emprendimiento se define como "crear tu propia empresa o autoemplearte, es decir, detectar una oportunidad de negocio, organizar los recursos necesarios y asumir riesgos para contribuir a tu desarrollo profesional y socioeconómico"

**38. De la definición anterior, señala con una "x" los tres aspectos que consideras más importantes para el emprendimiento**

|                                                 |                     |                                             |
|-------------------------------------------------|---------------------|---------------------------------------------|
| Detectar una oportunidad de negocio             | Autoemplearte       | Gestionar recursos (humanos, económicos...) |
| Mejorar tu desarrollo profesional               | Asumir algún riesgo | Generar nuevos puestos de trabajo           |
| Otros aspectos relevantes. Indica cuáles: ..... |                     |                                             |

**39. De las asignaturas que cursas o has cursado ¿cuáles crees que favorecen más el emprendimiento? Indica 3**

.....

**40. Valora de 1 a 5 tu grado de interés personal por el emprendimiento (1= nada, 2=poco, 3=algo, 4=bastante y 5=mucho)**

**41. ¿Conoces alguna red de emprendimiento?** ☐ No ☐ Sí, ¿cuál o cuáles? .....

**42. Señala con una "x" los tres motivos que consideras más importantes para crear tu empresa**

|                             |                            |                                              |
|-----------------------------|----------------------------|----------------------------------------------|
| Tradición familiar          | Generar trabajo para otros | Ganar dinero                                 |
| Independencia económica     | Conseguir trabajo          | Poner en práctica mis ideas                  |
| Reconocimiento social       | Dirigir un grupo humano    | Contribuir al crecimiento económico y social |
| Otros. Indica cuáles: ..... |                            |                                              |

**43. Señala con una "x" las tres dificultades más importantes que percibes en la sociedad para crear tu propia empresa**

|                            |                                        |                                              |
|----------------------------|----------------------------------------|----------------------------------------------|
| Asumir riesgos             | Trabajar demasiadas horas              | Falta de dinero para iniciar la actividad    |
| Escaso apoyo institucional | Temor a fracasar                       | Deficiente formación recibida para emprender |
| Imagen del empresario      | Excesiva burocracia ( <i>papeleo</i> ) | Carencia de ideas para iniciar la empresa    |
| Poco apoyo familiar        | Otros. Indica cuáles: .....            |                                              |

**44. Valora la presencia que han tenido los siguientes aspectos en tu formación (1= nada, 2=poco, 3=algo, 4=bastante y 5=mucho)**

| METODOLOGÍAS                     | 1-5 | CAPACIDADES                                            | 1-5 | CONOCIMIENTOS                            | 1-5 |
|----------------------------------|-----|--------------------------------------------------------|-----|------------------------------------------|-----|
| Clases teóricas                  |     | Liderazgo                                              |     | Plan de empresa                          |     |
| Ejercicios prácticos             |     | Compromiso y motivación                                |     | Marketing                                |     |
| Estudios de caso                 |     | Creatividad/Innovación                                 |     | Idiomas                                  |     |
| Diseño de Proyectos              |     | Gestión de conflictos/crisis (tolerancia a la presión) |     | Informática                              |     |
| Trabajo en equipo                |     | Capacidad comunicativa                                 |     | Planificación de organizaciones          |     |
| Resolución de problemas          |     | Capacidad de negociación y toma de decisiones          |     | Obtención de recursos                    |     |
| Exposición y defensa de trabajos |     | Gestión del tiempo para el trabajo propio y del equipo |     | Aspectos legales de creación de empresas |     |
|                                  |     | Capacidad de búsqueda de recursos                      |     | Gestión administrativa                   |     |

**Observaciones.** Si quieres realizar alguna anotación utiliza el espacio siguiente:

**MUCHAS GRACIAS POR TU COLABORACIÓN**

**Red de Grupos de Investigación OcioGune**

**Universidades**

Santiago de Compostela, Barcelona, Burgos, Deusto, La Rioja, Nacional de Educación a Distancia, València.

**Contacto:** angela.devalenzuela@usc.es
