# Supplementary material for: The Association of Parental Interest in Entrepreneurship with the Entrepreneurial Interest of Spanish Youth
Source: MDPI journal article supplement (doi:10.3390/ijerph17134744), 2020-07-01
Supplement: s1 [file s1]

FINANCIADO POR EL PLAN NACIONAL I+D+i (2012-2015)

Códigos:

EDU2012-39080-C07-00

EDU2012-39080-C07-01 | EDU2012-39080-C07-05

EDU2012-39080-C07-03 | EDU2012-39080-C07-06

EDU2012-39080-C07-04 | EDU2012-39080-C07-07

## CUESTIONARIO PARA LAS FAMILIAS

De los tiempos educativos a los tiempos sociales: la construcción cotidiana de la condición juvenil en una sociedad de redes. Problemáticas y alternativas pedagógico-sociales.

Con este cuestionario, anónimo y confidencial, pretendemos conocer cómo influyen los tiempos académicos y de ocio en la vida cotidiana de los chicos y chicas que están cursando Educación Secundaria Postobligatoria. Solicitamos su colaboración para que nos dedique unos minutos y responda con sinceridad a todas las preguntas.

Por favor, una vez respondido, métele en el sobre, ciérrelo y devuélvalo a su hijo o hija para que lo entregue en su centro de estudio; allí los cuestionarios serán recogidos por una persona del equipo de investigación.

Muchas gracias.

Persona que responde al cuestionario: ☐ Madre/ tutora ☐ Padre/ tutor

Año de nacimiento de la persona que responde al cuestionario: .....

## SU HIJO/A (que le entregó el cuestionario)

1. Desde que su hijo/a está en Educación Secundaria Postobligatoria (desde que dejó la ESO), ¿cuál es la nota que se repite más en sus evaluaciones? Indique una cifra entre 0 y 10: .....

2. Su hijo/a, además de estudiar, ¿tiene un trabajo remunerado? ☐ Sí ☐ No

## DATOS GENERALES DE LA FAMILIA

3. Indique el número de hijas o hijos que tiene a su cuidado en función de los siguientes tramos de edad (sin incluir el hijo/a que le entregó el cuestionario):

| Menos de 3 años | De 3 a 6 años | De 7 a 12 años | De 13 a 18 años |
|-----------------|---------------|----------------|-----------------|
|                 |               |                |                 |

4. Aproximadamente ¿cuáles son los ingresos mensuales de su unidad familiar? ..... €

5. ¿Cuál es su nivel de estudios y situación profesional? Marque con una "X"

| Estudios                 |                          |                             |                           | Situación Profesional    |                                                   |                          |                          |                          |                          |
|--------------------------|--------------------------|-----------------------------|---------------------------|--------------------------|---------------------------------------------------|--------------------------|--------------------------|--------------------------|--------------------------|
| Ninguno                  | Primarios (EGB)          | Secundarios (Bachiller, FP) | Superiores Universitarios | Empleado/a cuenta ajena  | Trabajador/a cuenta propia (autónomo, empresario) | Atención del hogar       | Paro                     | Pensionista              | Jubilado/a               |
| <input type="checkbox"/> | <input type="checkbox"/> | <input type="checkbox"/>    | <input type="checkbox"/>  | <input type="checkbox"/> | <input type="checkbox"/>                          | <input type="checkbox"/> | <input type="checkbox"/> | <input type="checkbox"/> | <input type="checkbox"/> |

## TIEMPOS COTIDIANOS

6. Indique su grado de acuerdo con las siguientes expresiones, escribiendo en cada casilla un número entre 1 y 5 (1= nada, 2=poco, 3=algo, 4=bastante y 5=mucho)

|                                                                              | 1-5                                                                                                                   |
|------------------------------------------------------------------------------|-----------------------------------------------------------------------------------------------------------------------|
| El horario escolar condiciona la organización del tiempo de mi familia       |                                                                                                                       |
| Nuestra familia está satisfecha con el horario escolar                       |                                                                                                                       |
| Los centros educativos deberían abrir sus instalaciones cuando no hay clases |                                                                                                                       |
| Mi hijo/a tiene una jornada diaria agotadora                                 |                                                                                                                       |
| Estoy satisfecho/a con las actividades de ocio de mi hijo/a                  |                                                                                                                       |
| Las horas de sueño de mi hijo/a son suficientes                              |                                                                                                                       |
| El tiempo compartido en familia es...                                        | suficiente de calidad                                                                                                 |
| Donde vivimos...                                                             | hay oferta suficiente de actividades de ocio para los jóvenes                                                         |
|                                                                              | hay suficientes equipamientos de ocio para los jóvenes (casa de cultura, centro cívico, pabellón polideportivo, etc.) |
|                                                                              | hay suficientes espacios abiertos de encuentro (zonas verdes, parques, plazas, etc.)                                  |
| Sobre las vacaciones escolares...                                            | su duración es suficiente                                                                                             |
|                                                                              | están bien distribuidas a lo largo del curso                                                                          |

## TIEMPOS COTIDIANOS

7. ¿Qué modalidad de horario escolar le parece mejor para su familia? *Tomando como referencia el horario del hijo/a que le entregó este cuestionario*

- ☐ Tener clase sólo por las mañanas
 ☐ Repartir las clases entre todas las mañanas y todas las tardes  
☐ Tener clase sólo por las tardes
 ☐ Te resulta indiferente  
☐ Repartir las clases entre todas las mañanas y una tarde
 ☐ Otra. ¿Cuál? .....  
☐ Repartir las clases entre todas las mañanas y varias tardes

8. ¿Cuántos minutos dedica su hijo/a diariamente a estudiar...? ..... minutos

Este tiempo... ☐ Es escaso ☐ Está bien ☐ Es excesivo

9. Indique el grado de preocupación que le producen las siguientes realidades en relación al hijo o hija que le ha entregado el cuestionario

(1= nada, 2=poco, 3=algo, 4=bastante y 5=mucho)

|                                                         | 1-5 |                                                                 | 1-5 |
|---------------------------------------------------------|-----|-----------------------------------------------------------------|-----|
| Las drogas                                              |     | Falta de valores                                                |     |
| El alcohol                                              |     | Competitividad                                                  |     |
| Excesiva libertad                                       |     | Falta de expectativas vitales                                   |     |
| Pocas obligaciones                                      |     | Futuro laboral                                                  |     |
| Consumismo                                              |     | Fracaso escolar                                                 |     |
| Falta de responsabilidad                                |     | Inseguridad y violencia en la calle                             |     |
| Demasiado tiempo ante el televisor y otros dispositivos |     | Malas compañías                                                 |     |
| Poco tiempo libre compartido en familia                 |     | Conductas delictivas (pequeños hurtos, tráfico de drogas, etc.) |     |
| Soledad y aislamiento                                   |     | Poco tiempo libre                                               |     |
| Falta de motivación                                     |     |                                                                 |     |

## TIEMPOS DE OCIO

10. Valore del 1 al 5 la importancia que otorga al ocio de sus hijos/as (1= nada, 2=poco, 3=algo, 4=bastante y 5=mucho)

Valoración: .....

11. Indique su grado de acuerdo con las siguientes expresiones (1= nada, 2=poco, 3=algo, 4=bastante y 5=mucho)

| Las actividades de ocio que realiza mi hijo hacen que...                                                                                              | 1-5 |
|-------------------------------------------------------------------------------------------------------------------------------------------------------|-----|
| Esté más en forma, controle mejor sus movimientos, mantenga o mejore su condición física, etc.                                                        |     |
| Se sienta más satisfecho, disfrute haciéndolas, se divierta, etc.                                                                                     |     |
| Sea más creativo, aprenda a tomar decisiones autónomas, adquiera conocimientos, aprenda cosas sobre sí mismo y sobre los demás, amplíe su mundo, etc. |     |
| Desarrolle nuevas destrezas manuales y adquiera o perfeccione habilidades técnicas                                                                    |     |
| Aumente su autoestima, se sienta más competente y capaz                                                                                               |     |
| Haga cosas diferentes con más gente, se sienta parte de un grupo, se relacione mejor con los demás, etc.                                              |     |

12. Indique con qué frecuencia realizan en familia las siguientes actividades (incluyendo al hijo/a que le entregó el cuestionario):  
(marque con una "X" cuantas veces necesite)

| 12. Indique con qué frecuencia realizan en familia las siguientes actividades (incluyendo al hijo/a que le entregó el cuestionario):<br>(marque con una "X" cuantas veces necesite) | Todas las semanas |          |        |               |        | Sólo<br>1-2<br>días al<br>mes | Sólo en<br>vacaciones | Nunca |
|-------------------------------------------------------------------------------------------------------------------------------------------------------------------------------------|-------------------|----------|--------|---------------|--------|-------------------------------|-----------------------|-------|
|                                                                                                                                                                                     | Lunes a viernes   |          |        | Fin de semana |        |                               |                       |       |
|                                                                                                                                                                                     | 1-2 días          | 3-4 días | 5 días | 1 día         | 2 días |                               |                       |       |
| Ver la televisión, vídeos, dvd, etc.                                                                                                                                                |                   |          |        |               |        |                               |                       |       |
| Juegos de mesa (parchís, ajedrez, etc.)                                                                                                                                             |                   |          |        |               |        |                               |                       |       |
| Jugar en el ordenador o con consolas                                                                                                                                                |                   |          |        |               |        |                               |                       |       |
| Hobbies como fotografía, pintura, escritura, bricolaje, tocar instrumentos musicales, etc.                                                                                          |                   |          |        |               |        |                               |                       |       |
| Practicar actividades físicas y deportivas (andar en bici, caminar, nadar, etc.)                                                                                                    |                   |          |        |               |        |                               |                       |       |
| Participar en asociaciones (de vecinos, culturales, deportivas, etc.)                                                                                                               |                   |          |        |               |        |                               |                       |       |
| Asistir a espectáculos culturales (cine, teatro, conciertos, etc.)                                                                                                                  |                   |          |        |               |        |                               |                       |       |
| Asistir a espectáculos deportivos (partidos, torneos, etc.)                                                                                                                         |                   |          |        |               |        |                               |                       |       |
| Salir a comer o a cenar                                                                                                                                                             |                   |          |        |               |        |                               |                       |       |
| Viajar                                                                                                                                                                              |                   |          |        |               |        |                               |                       |       |
| Otro ;cuál?                                                                                                                                                                         |                   |          |        |               |        |                               |                       |       |

## VIDA FAMILIAR

13. Indique su grado de acuerdo con las siguientes expresiones (1= nada, 2=poco, 3=algo, 4=bastante y 5=mucho)

|                                                                                | 1-5 |
|--------------------------------------------------------------------------------|-----|
| La mayoría de las veces mi vida familiar es ideal                              |     |
| Las condiciones de mi vida familiar son excelentes                             |     |
| Estoy satisfecho/a con mi vida familiar                                        |     |
| Hasta ahora he conseguido las cosas importantes que quiero en mi vida familiar |     |
| Si pudiera decidir sobre mi vida familiar, no cambiaría nada                   |     |

## SALUD Y CALIDAD DE VIDA

14. Indique cuántos días a la semana (de lunes a domingo) camina o pasea y hace deporte y cuánto tiempo le dedica

Paseo o camino ..... días a la semana y suelo dedicarle ..... minutos cada vez.

Practico deporte ..... días a la semana y suelo dedicarle ..... minutos cada vez

15. Indique su grado de acuerdo con las siguientes expresiones (1= nada, 2=poco, 3=algo, 4=bastante y 5=mucho)

|                                           | 1-5 |
|-------------------------------------------|-----|
| Estoy satisfecho/a con mi imagen corporal |     |
| Estoy en buena forma física               |     |
| Soy una persona físicamente activa        |     |
| En general, estoy a gusto con mi vida     |     |

## ESTUDIOS Y MERCADO LABORAL EN EL FUTURO

16. Indique su grado de acuerdo con las siguientes expresiones (1= nada, 2=poco, 3=algo, 4=bastante y 5=mucho)

| Estudiar ayuda a mi hija/o a...                             | 1-5 | Trabajar ayuda a mi hija/o a...             | 1-5 |
|-------------------------------------------------------------|-----|---------------------------------------------|-----|
| Tener éxito en la vida                                      |     | Independizarse                              |     |
| Encontrar trabajo                                           |     | Colaborar con la familia                    |     |
| Relacionarse con los compañeros/as                          |     | Sentirse útil                               |     |
| Ganar dinero                                                |     | Disponer de dinero                          |     |
| Prefiero que mi hija/o busque trabajo a que siga estudiando |     | Merece la pena que mi hija/o busque trabajo |     |

## EMPRENDIMIENTO

El **emprendimiento** se entiende como crear su propia empresa o autoemplearse, es decir, detectar una oportunidad de negocio, gestionar los recursos necesarios y asumir riesgos para contribuir a su desarrollo profesional y socioeconómico.

17. Valore del 1 al 5 en qué grado le gustaría que su hijo/a se decidiera a crear su propia empresa (1= nada, 2=poco, 3=algo, 4=bastante y 5=mucho)

Valoración: .....

18. Valore del 1 al 5 en qué grado ayudaría a su hijo/a si se decidiera a crear su propia empresa (1= nada, 2=poco, 3=algo, 4=bastante y 5=mucho)

Valoración: .....

| Mi ayuda sería...               | 1-5 |
|---------------------------------|-----|
| Apoyo económico                 |     |
| Apoyo moral                     |     |
| Aportando ideas                 |     |
| Otro tipo de apoyo ¿cuál? ..... |     |
| .....                           |     |
| .....                           |     |

**Observaciones.** Si quiere realizar alguna anotación utiliza el espacio siguiente:

MUCHAS GRACIAS POR SU COLABORACIÓN

Red de Grupos de Investigación OcioGune  
Universidades

Santiago de Compostela, Barcelona, Burgos, Deusto, La Rioja, Nacional de Educación a Distancia, València.

Contacto: angela.devalenzuela@usc.es
